# Supplementary material
Source: Springer Nature journal article supplement (https://www.springerprofessional.de/resource/supplementary/13638_2014_1062_MOESM6_ESM.pdf/11898932)

Transmission range: 100m

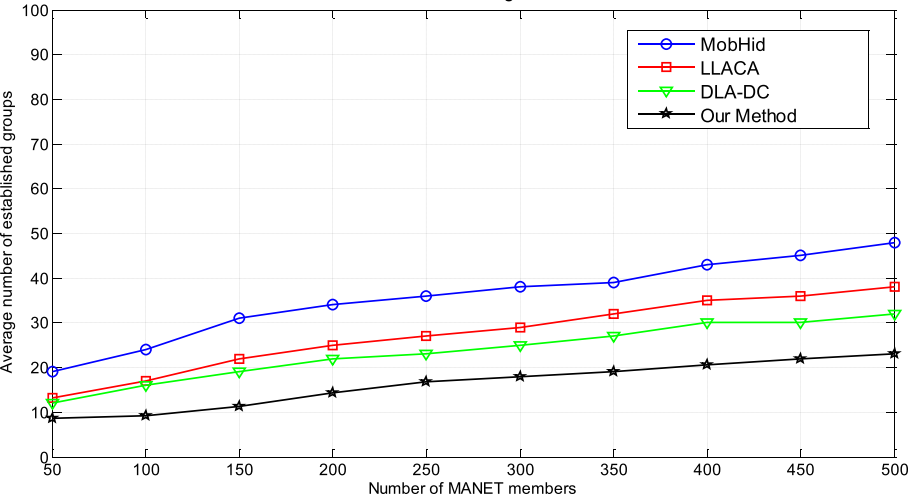

Supplement: MOESM6 [file 11898932]
